# Supplementary material
Source: publisher figshare collection journal article supplement (https://acs.figshare.com/ndownloader/files/3761557)
Supplement: Supplementary file 1 [file 3761557]

# Charge Transfer Properties of Benzo[*b*]thiophene Ferrocenyl Complexes

Alessandro Donoli,<sup>†, §</sup> Annalisa Bisello,<sup>†</sup> Roberta Cardena,<sup>†</sup> Marco Crisma,<sup>‡</sup> Laura Orian<sup>†</sup> and Saverio Santi<sup>\*, †</sup>.

<sup>†</sup>Department of Chemical Science, University of Padova, via Marzolo 1, 35131 Padova, Italy

<sup>‡</sup>Institute of Biomolecular Chemistry, Padova Unit, CNR, via Marzolo 1, 35131 Padova, Italy

<sup>§</sup>Present address: Luxottica S.r.l. Via Valcozzena 10, 32021 Agordo (BL), Italy.

\*Email: saverio.santi@unipd.it

## Supporting Information

### Table of Contents

|                                                                                                                  |          |
|------------------------------------------------------------------------------------------------------------------|----------|
| Crystal packing analysis of <b>B</b>                                                                             | page S2  |
| <b>Figure S1.</b> Intermolecular contacts in the asymmetric unit of ( <b>B</b> )                                 | page S3  |
| <b>Figure S2.</b> The intermolecular S2–aromatic interaction (molecule <b>B2</b> )                               | page S3  |
| <b>Figure S3.</b> <sup>1</sup> H-NMR and 2D-heterocorrelated HMQC spectra of <b>A</b>                            | page S4  |
| <b>Figure S4.</b> <sup>1</sup> H-NMR and 2D-heterocorrelated HMQC spectra of <b>B</b>                            | page S5  |
| <b>Figure S5.</b> <sup>1</sup> H-NMR and 2D-heterocorrelated HMQC spectra of <b>C1</b> + <b>C2</b>               | page S6  |
| <b>Figure S6.</b> <sup>1</sup> H-NMR and 2D-heterocorrelated HMQC spectra of <b>D</b>                            | page S7  |
| <b>Figure S7.</b> Experimental ESI mass spectrum of <b>A</b>                                                     | page S8  |
| <b>Figure S8.</b> Experimental ESI mass spectrum of <b>B</b>                                                     | page S9  |
| <b>Figure S9.</b> Experimental ESI mass spectrum of <b>C1</b> + <b>C2</b>                                        | page S10 |
| <b>Figure S10.</b> Experimental ESI mass spectrum of <b>D</b>                                                    | page S11 |
| <b>Figure S11.</b> Energy profile along the dihedral $\Phi_5$ of <b>C1</b> , <b>C2</b> , <b>D1</b> and <b>D2</b> | page S12 |
| <b>Figure S12.</b> Fully optimized conformers of <b>D1</b> and <b>D2</b>                                         | page S12 |
| <b>Figure S13.</b> HOMO and LUMO of neutral complexes                                                            | page S13 |

**Crystal packing analysis of 3-ferrocenylbenzo[*b*]thiophene (B).** Within the asymmetric unit, a C-H... $\pi$  edge-to-face interaction is observed between the C15–H15 group of the distal Cp ring of molecule **B1** with the benzo[*b*]thiophene of molecule **B2**, the closest contacts being with the C23 and C24 atoms (Figure S1). Specifically, the distances C15...C23 and H15...C23 and the angle C15-H15...C23 are 3.601(4) Å, 2.77 Å and 150°, respectively, whereas the distances C15...C24 and H15...C24 and the angle C15-H15...C24 are 3.744(4) Å, 2.81 Å and 176°, respectively. An additional C-H... $\pi$  interaction is found between the C14-H14 group (distal Cp of molecule **B1**) and the proximal Cp ring of molecule **B2**, for which the distances C14...C33 and H14...C33 and the angle C14-H14...C33 are 3.677(5) Å, 2.50 Å and 153°, respectively.

In the packing mode, a sulfur – aromatic interaction<sup>1</sup> takes place between S2 (molecule **B2**) and the proximal Cp ring of a (x, 1+y, z) symmetry equivalent of molecule **B1**, the S2...C9 and S2...C13 intermolecular distances being 3.495(3) Å and 3.358(4) Å, respectively (Figure S2). Conversely, the S1 atom of molecule **B1** is not involved in any intermolecular contact with aromatic carbons shorter than 3.85 Å. The closest intermolecular contact [3.350(4) Å] between molecules of the same kind (**B2** – **B2**) is found between the (benzo[*b*]thiophene) C27 atom and the (x-1, y, z) symmetry equivalent of the (proximal Cp) C30 atom.

---

<sup>1</sup> Meyer, E. A.; Castellano, R. K.; Diederich, F. *Angew. Chem., Int. Ed.* **2003**, 42, 1210–1250.

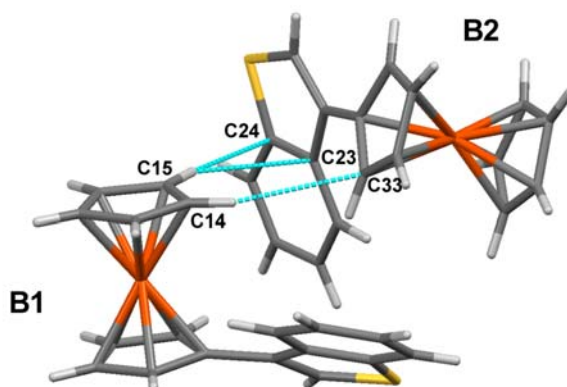

**Figure S1.** Intermolecular contacts between the independent molecules **B1** and **B2** in the asymmetric unit of (**B**). The atoms participating in C-H... $\pi$  interactions (indicated by dashed lines) are labelled.

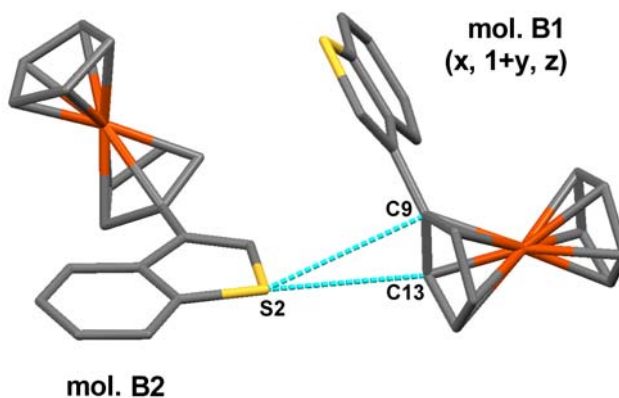

**Figure S2.** The intermolecular sulfur–aromatic interaction occurring between S2 (molecule **B2**) and the proximal Cp ring of the (x, 1+y, z) symmetry equivalent of molecule **B1** in the packing mode of (**B**). H-atoms have been omitted for clarity.

NMR and ESI spectra of the products.

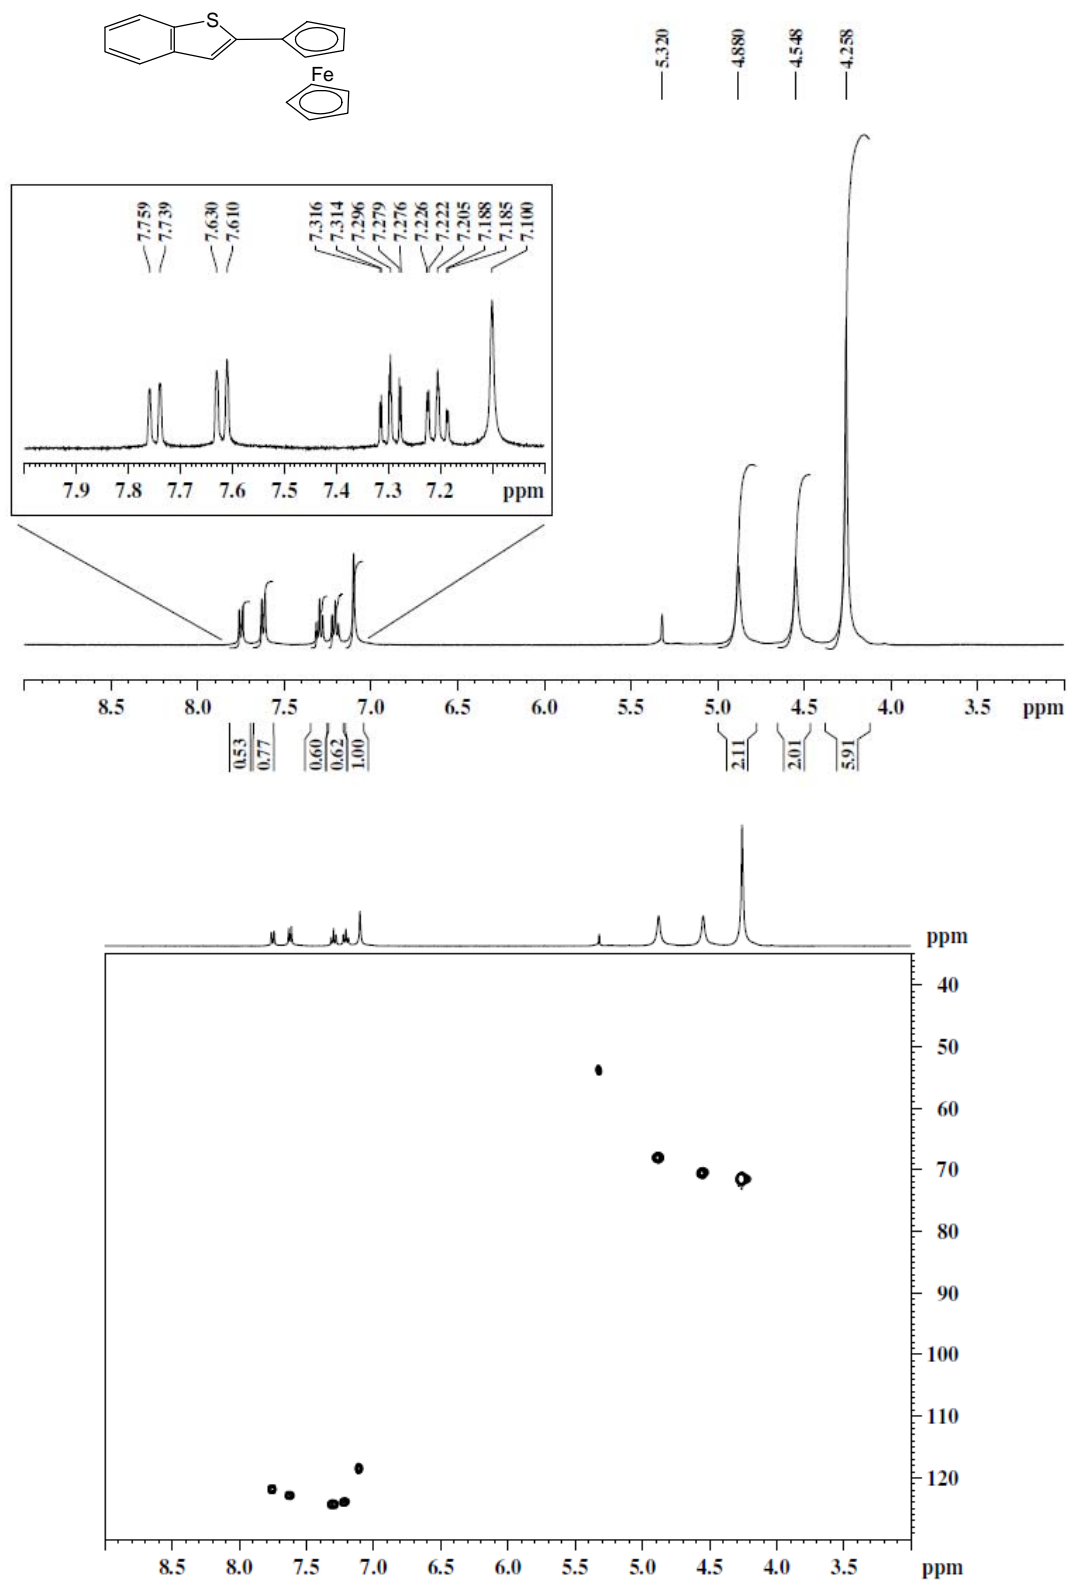

**Figure S3.** <sup>1</sup>H-NMR and 2D-heterocorrelated HMQC spectra of 2-ferrocenylbenzo[*b*]thiophene (A).

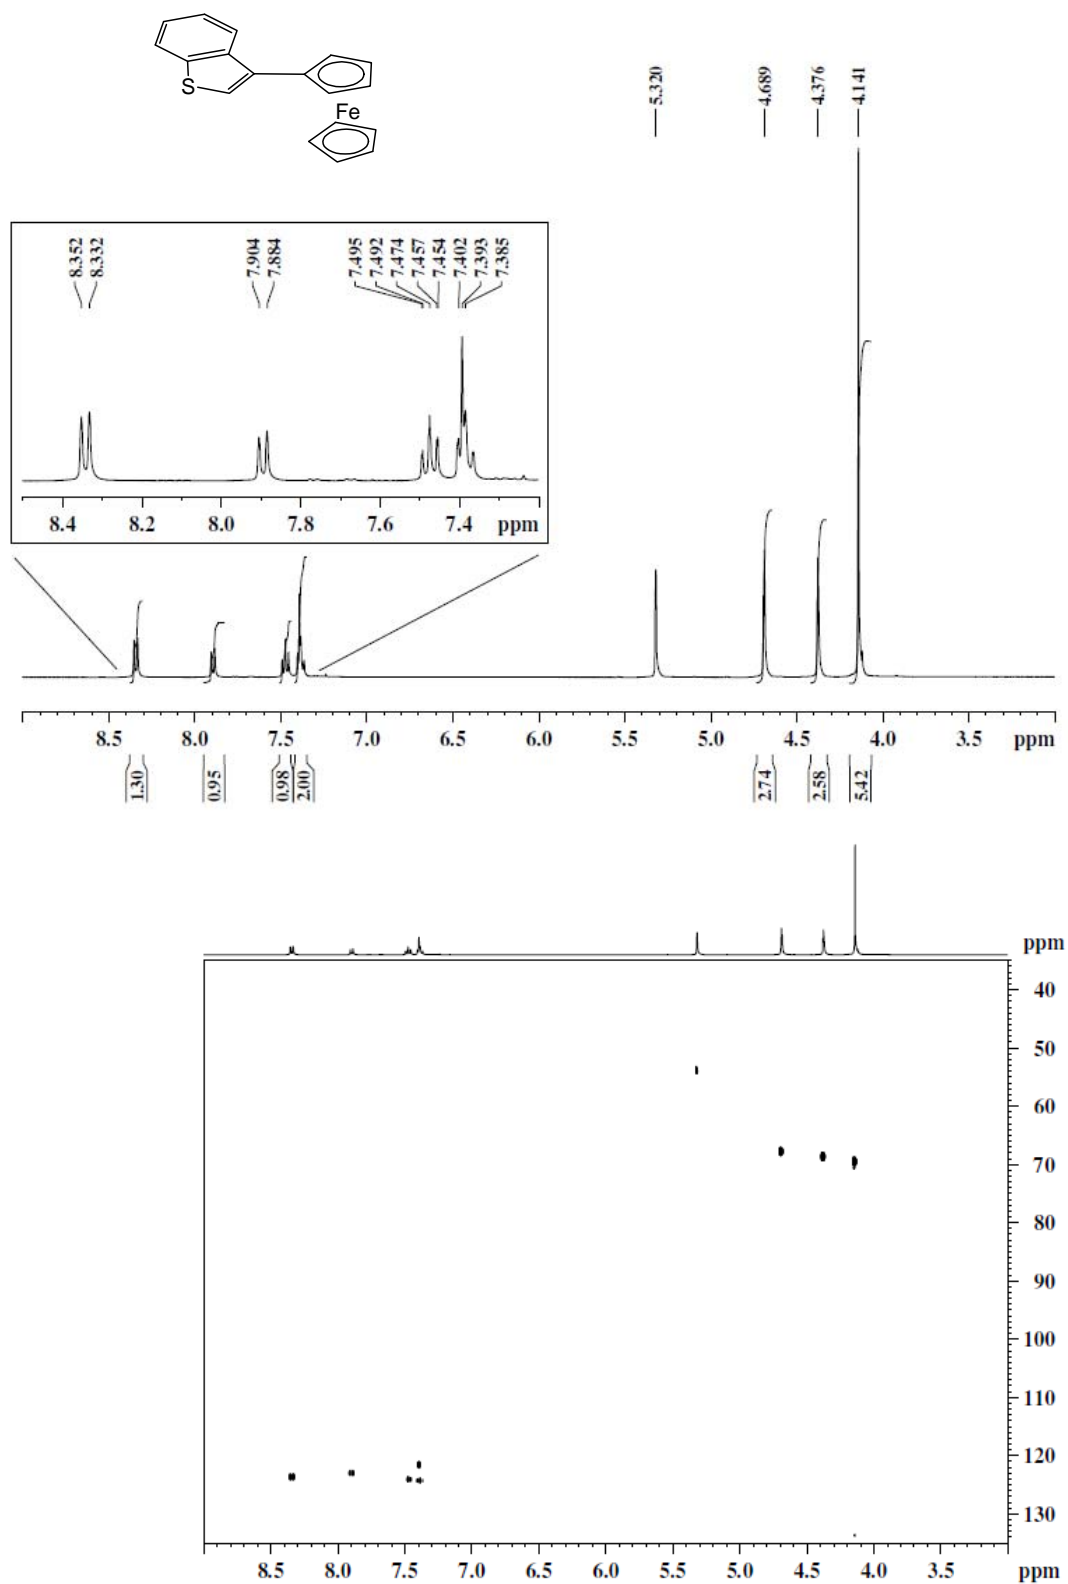

**Figure S4.** <sup>1</sup>H-NMR and 2D-heterocorrelated HMQC spectra of 3-ferrocenylbenzo[*b*]thiophene (B).

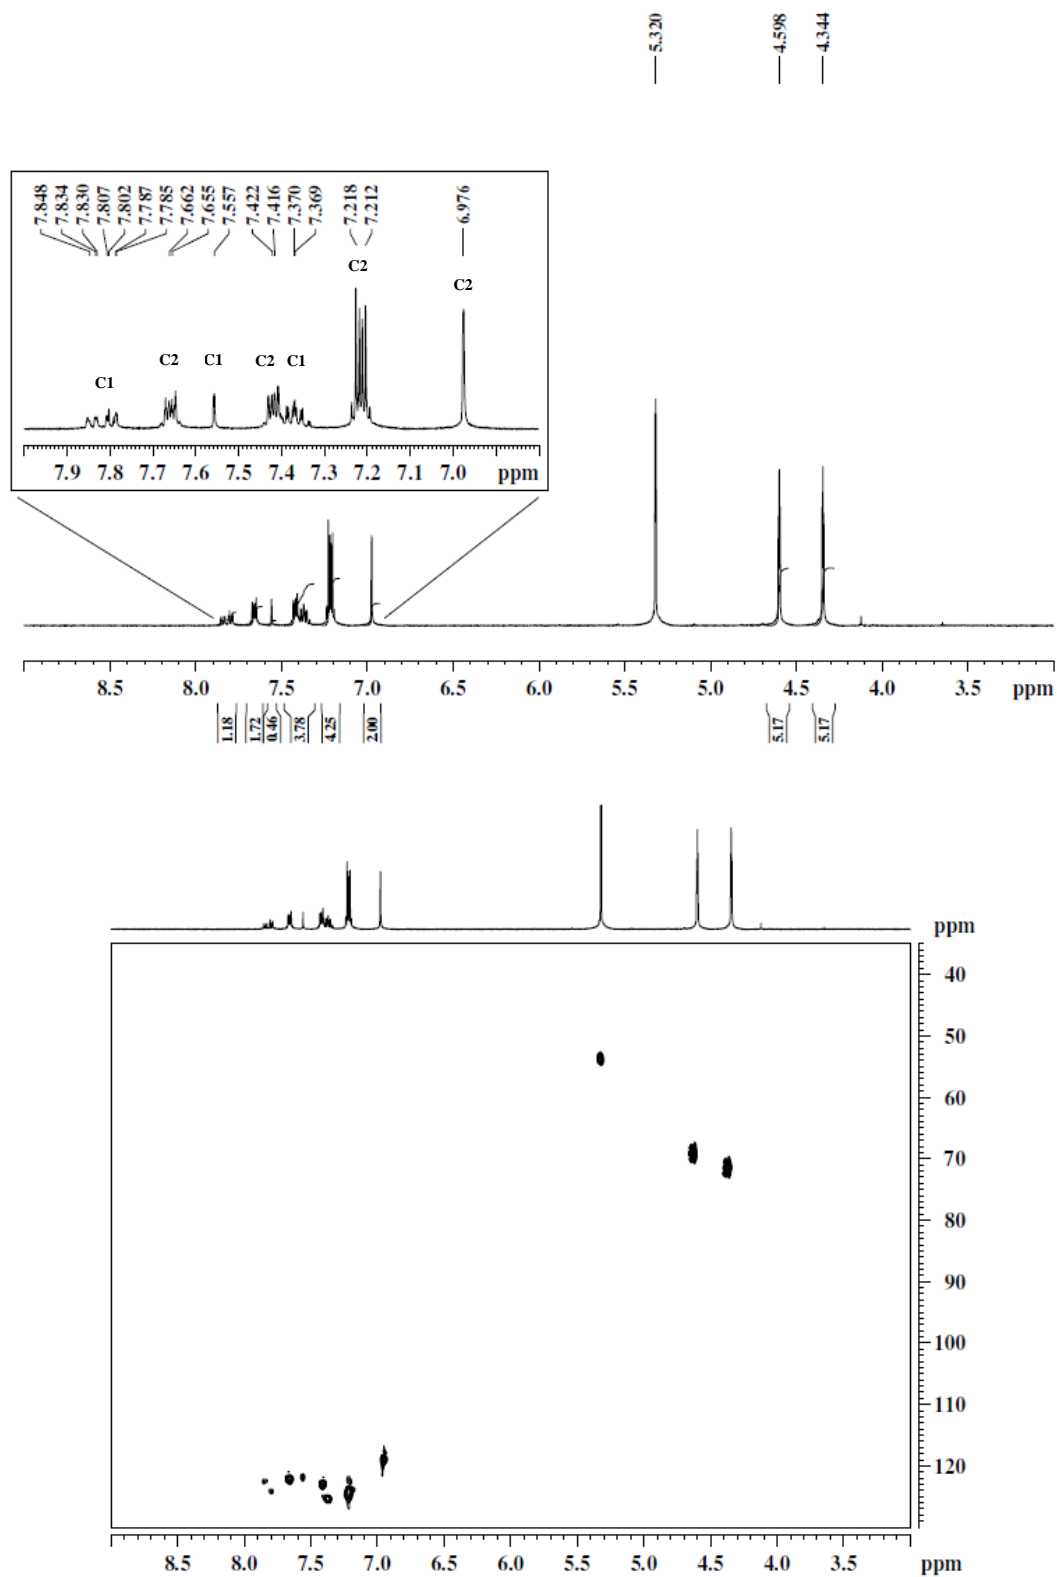

**Figure S5.**  $^1\text{H}$ -NMR and 2D-heterocorrelated HMQC spectra of 1,1'-bis(2-benzo[*b*]thiophene)ferrocenes (C1 + C2).

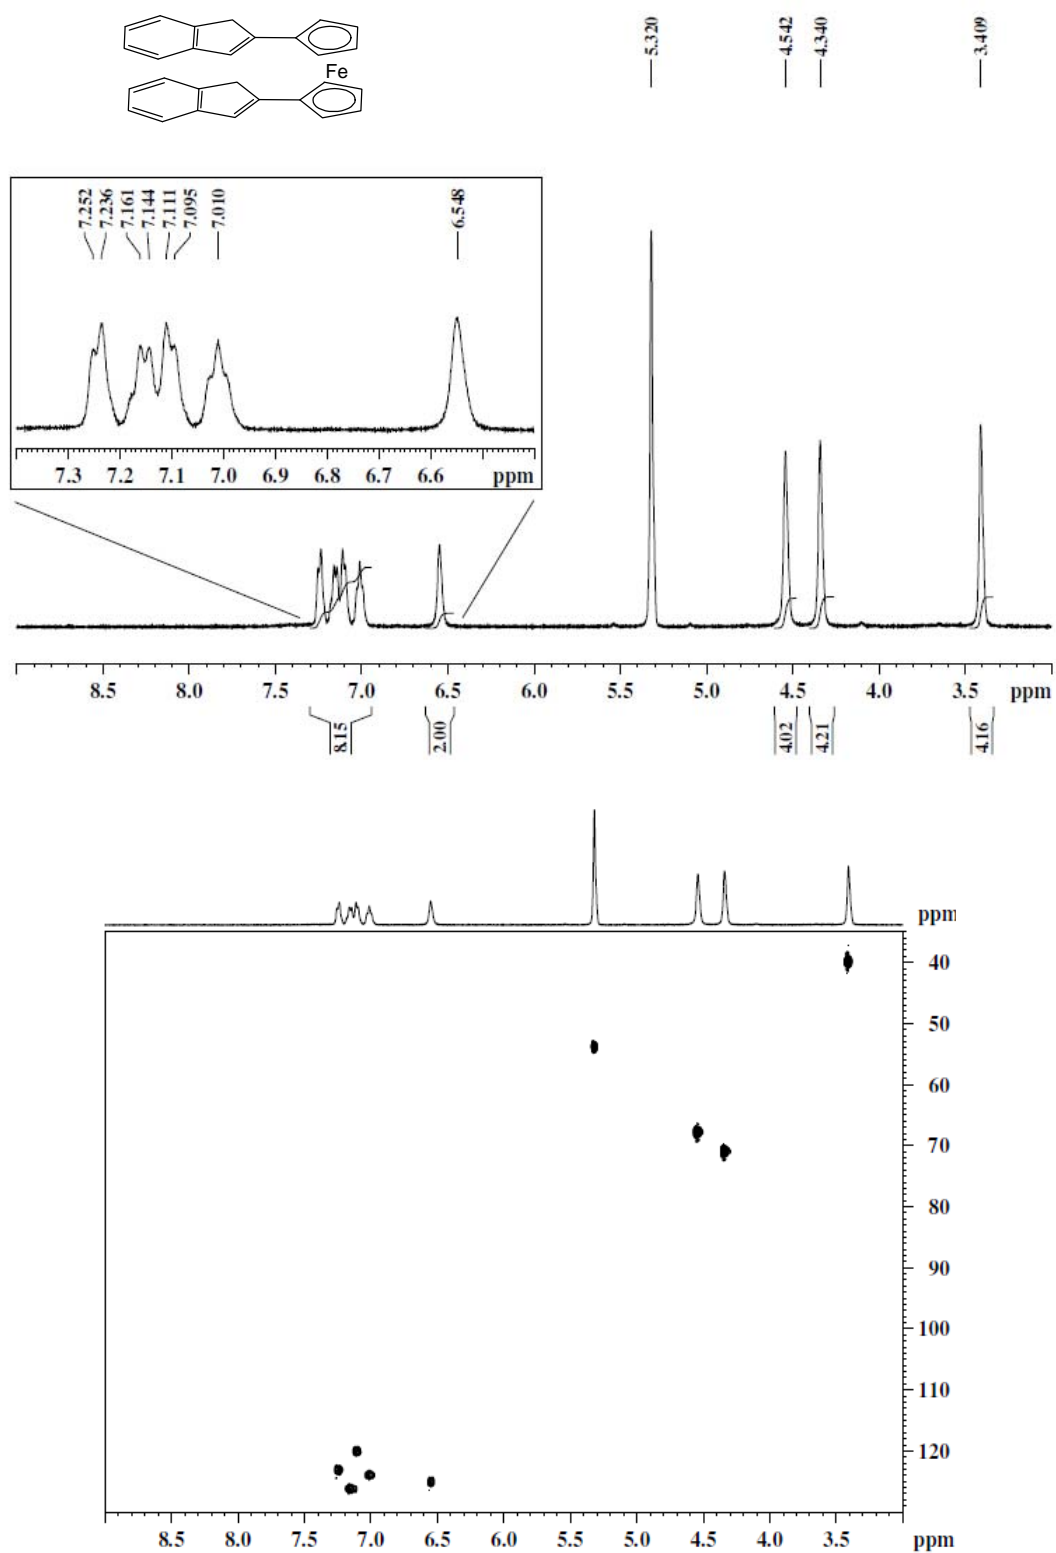

**Figure S6**  $^1\text{H}$ -NMR and 2D-heterocorrelated HMQC spectra of 1,1'-bis(2-indene)ferrocene (**D**).

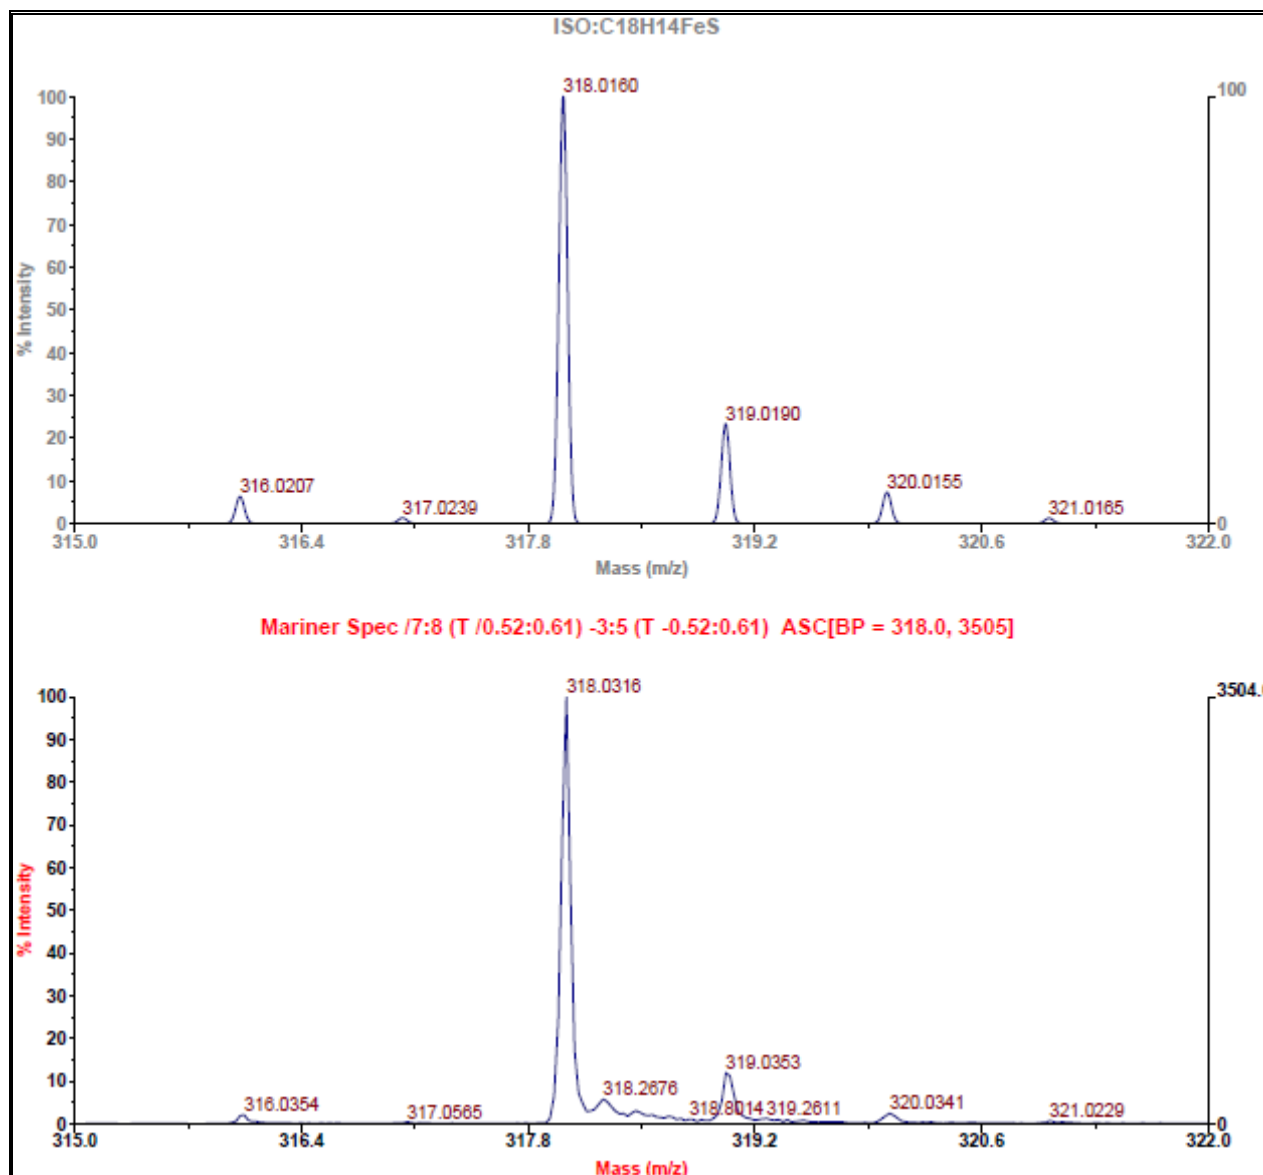

**Figure S7.** Experimental (bottom) and simulated (top) ESI mass spectra of 2-ferrocenylbenzo[*b*]thiophene (**A**).



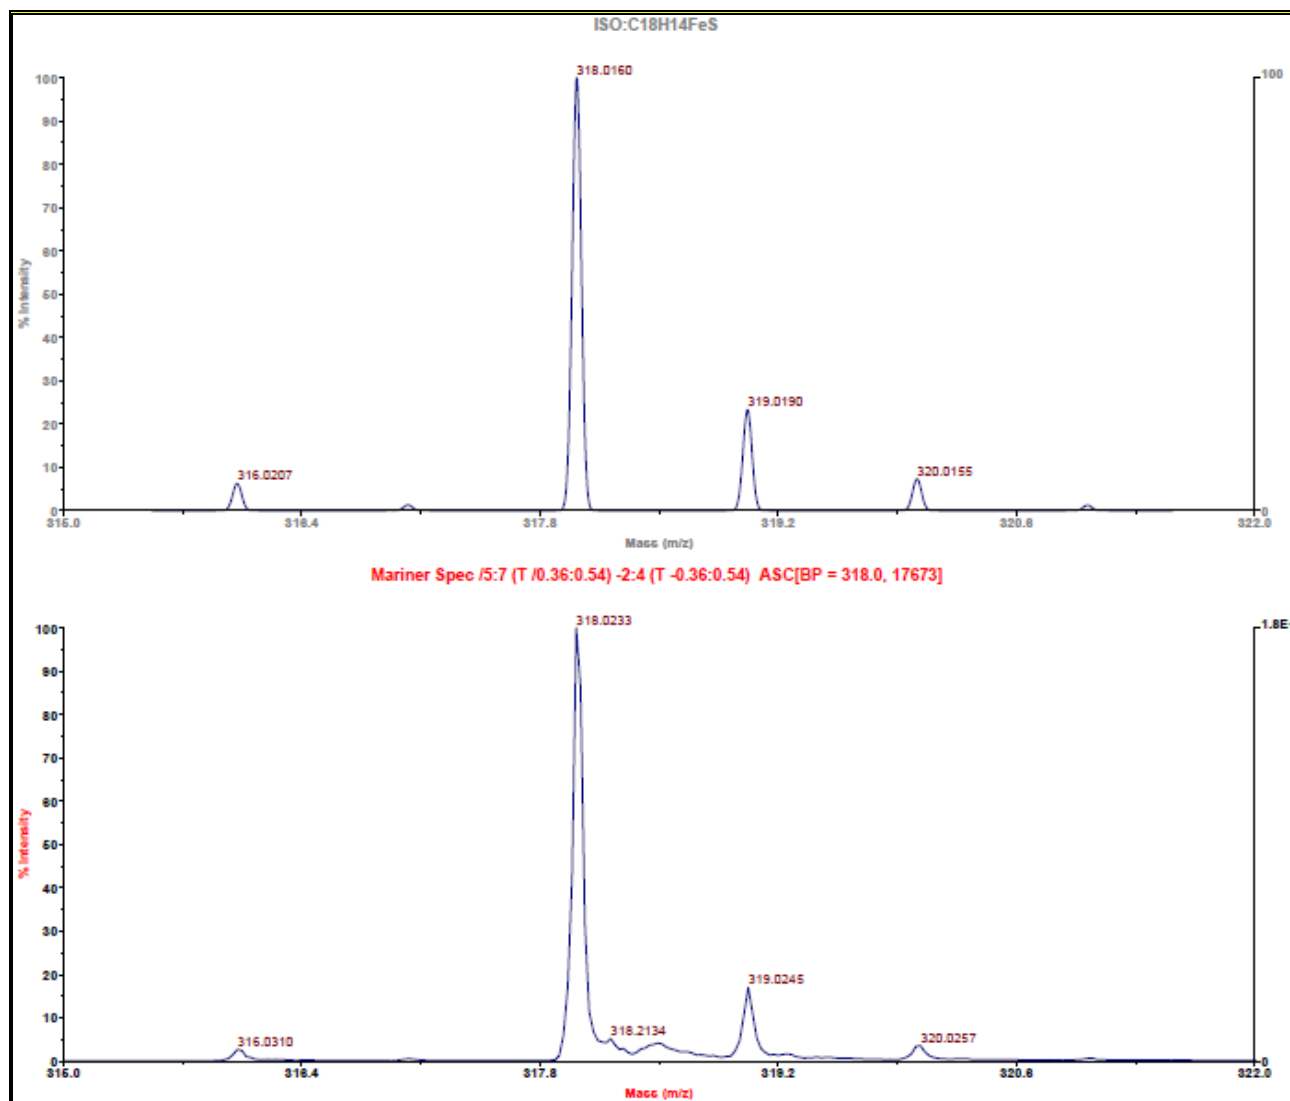

**Figure S8.** Experimental (bottom) and simulated (top) ESI mass spectra of 3-ferrocenylbenzo[b]thiophene (**B**).

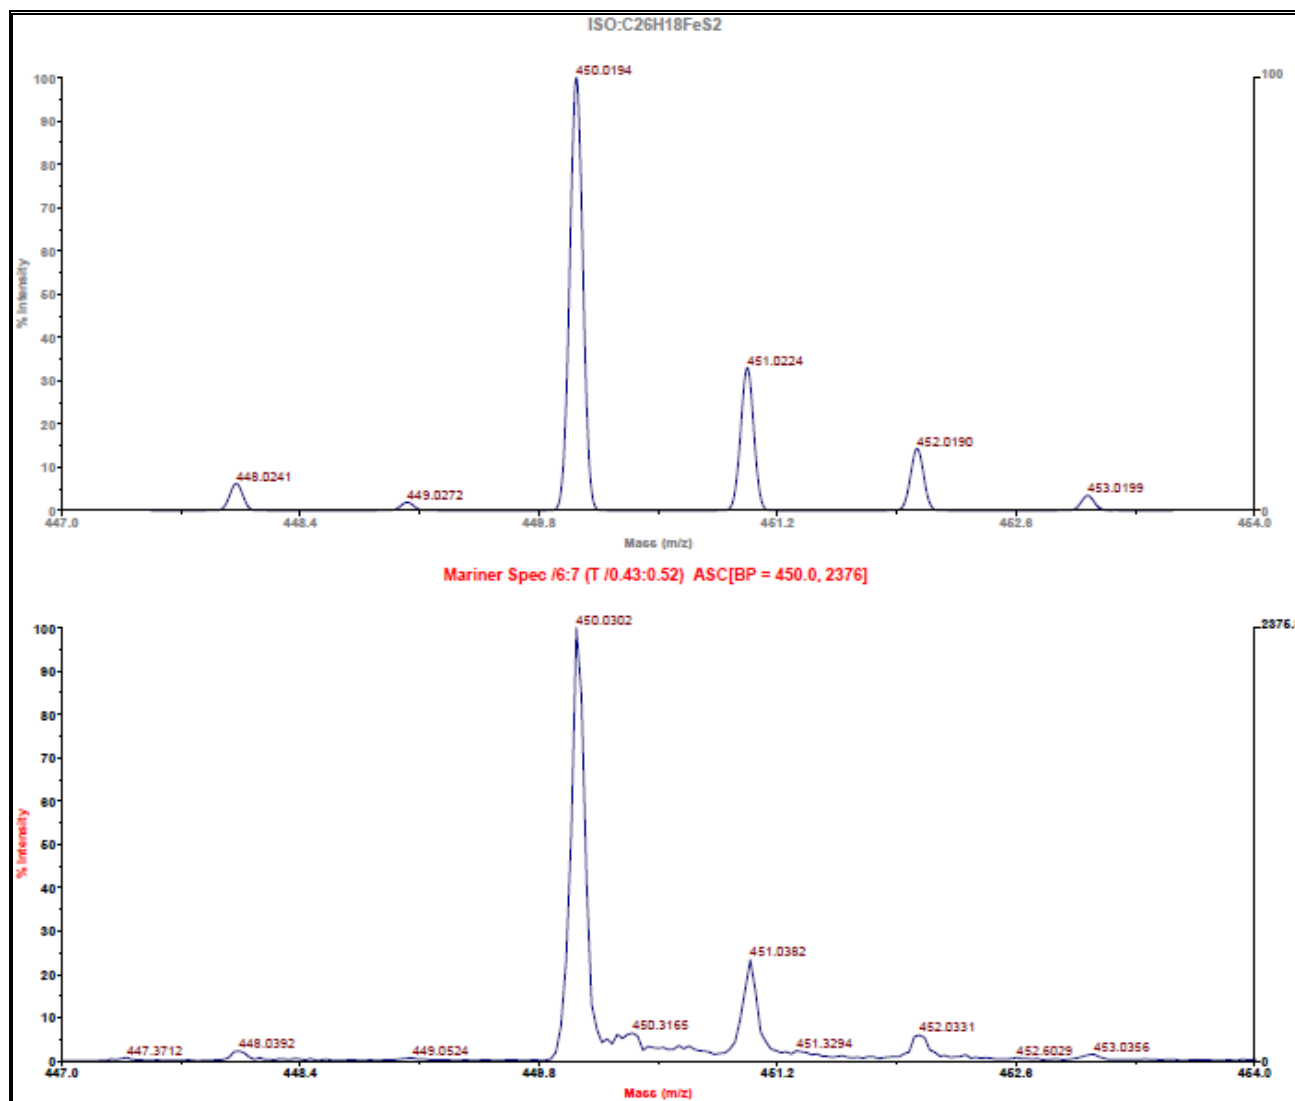

**Figure S9.** Experimental (bottom) and simulated (top) ESI mass spectra of 1,1'-bis(2-benzo[*b*]thiophene)ferrocenes (**C1** + **C2**).

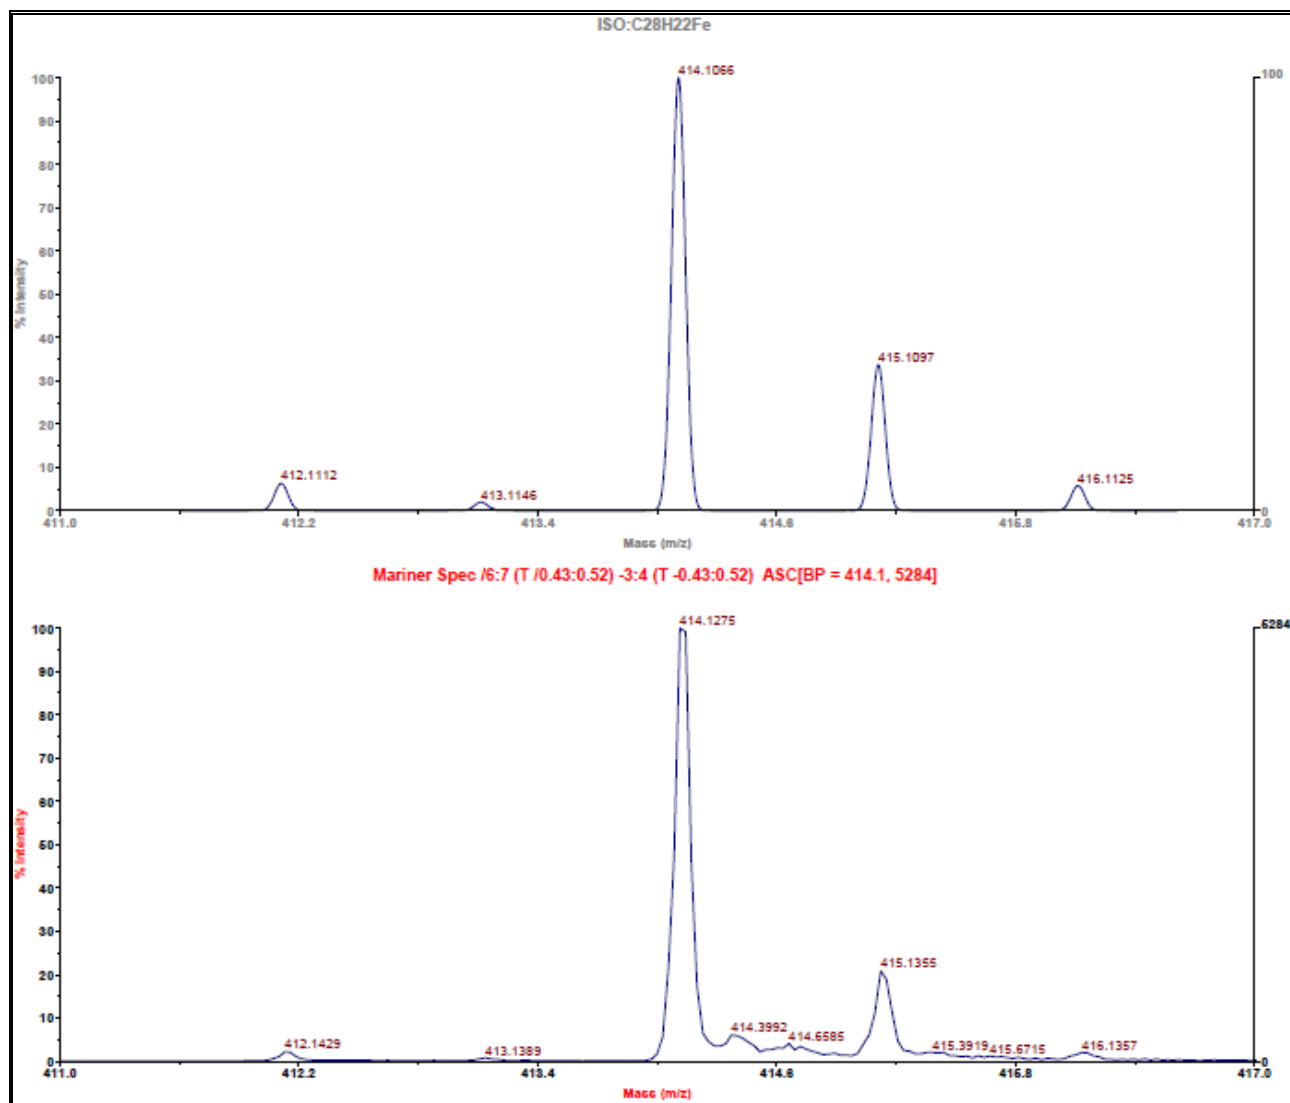

**Figure S10.** Experimental (bottom) and simulated (top) ESI mass spectra of 1,1'-bis(2-indene)ferrocene (**D**).

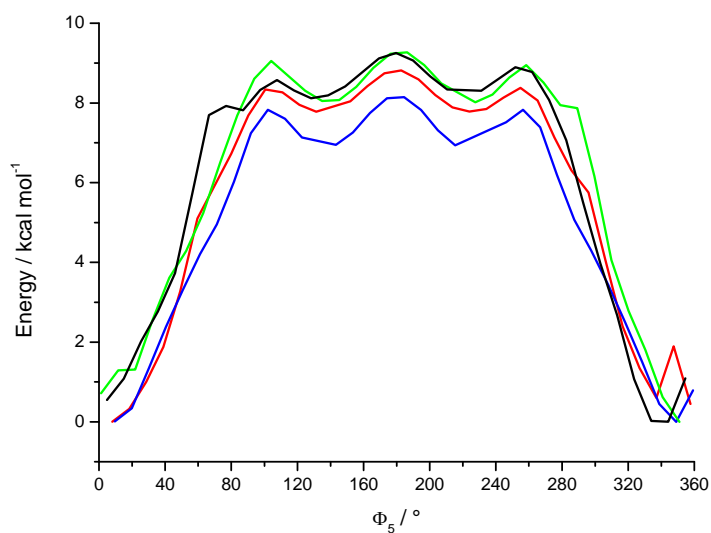

**Figure S11.** Energy profile along the dihedral  $\Phi_5$  of **C1** (red), **C2** (black), **D1** (blue) and **D2** (green); energies are relative to the energy of the initial structure which corresponds to the global minimum. The level of theory is BP86+D3BJ/TZP small core.

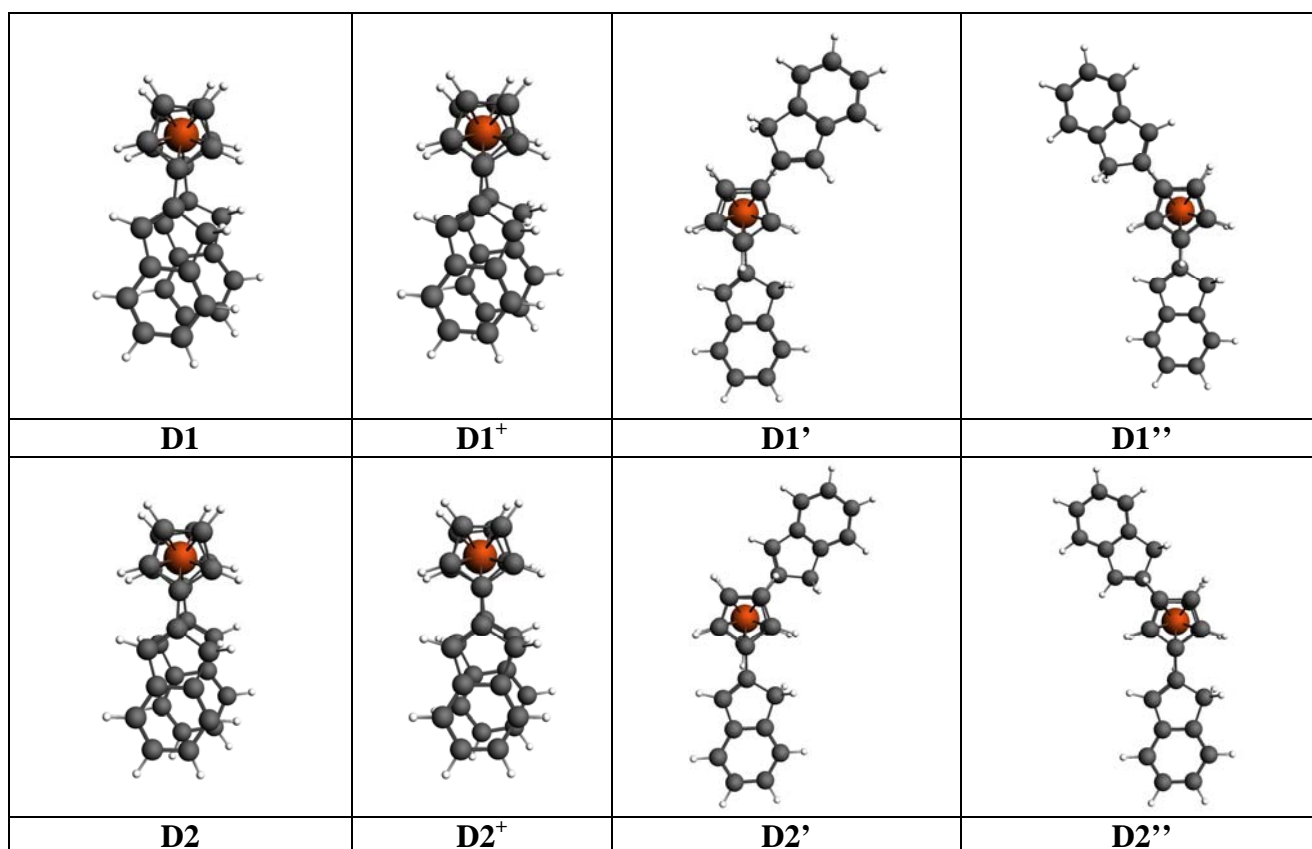

**Figure S12.** Fully optimized conformers of **D1** and **D2**; level of theory: BP86+D3/TZ2P small core.

|                                                                                     |                                                                                      |
|-------------------------------------------------------------------------------------|--------------------------------------------------------------------------------------|
| 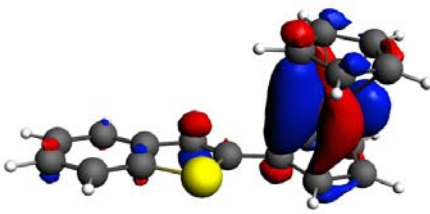   |    |
| <b>A: HOMO</b>                                                                      | <b>A: LUMO</b>                                                                       |
|    |    |
| <b>B: HOMO</b>                                                                      | <b>B: LUMO</b>                                                                       |
|    |    |
| <b>C1: HOMO</b>                                                                     | <b>C1: LUMO</b>                                                                      |
|  |  |
| <b>C2: HOMO</b>                                                                     | <b>C2: LUMO</b>                                                                      |
|  |  |
| <b>D1: HOMO</b>                                                                     | <b>D1: LUMO</b>                                                                      |
|  |  |
| <b>D2: HOMO</b>                                                                     | <b>D2: LUMO</b>                                                                      |

**Figure S13.** HOMO and LUMO of neutral complexes; level of theory: BP86/TZ2P small core (A and B) and BP86+D3/TZ2P small core (C1, C2, D1 and D2).
